# Supplementary material for: Iron Overload Accelerates the Progression of Diabetic Retinopathy in Association with Increased Retinal Renin Expression
Source: PubMed Central journal article supplement (PMC5813018; doi:10.1038/s41598-018-21276-2), 2018-02-14
Supplement: 41598_2018_21276_MOESM1_ESM.pdf [file 41598_2018_21276_MOESM1_ESM.pdf]

**Iron Overload Accelerates the Progression of Diabetic Retinopathy in Association with Increased Retinal Renin Expression**

Kapil Chaudhary<sup>1</sup>, Wanwisa Promsote<sup>2</sup>, Sudha Ananth<sup>3</sup>, Rajalakshmi Veeranan-Karmegam<sup>3</sup>, Amany Tawfik<sup>4</sup>, Pachiappan Arjunan<sup>4</sup>, Pamela Martin<sup>3</sup>, Sylvia B. Smith<sup>5</sup>, Muthusamy Thangaraju<sup>3</sup>, Oleg Kisselev<sup>7</sup>, Vadivel Ganapathy<sup>6</sup>, Jaya P. Gnana-Prakasam<sup>7\*</sup>

Control 1  
db/db 1

Control 2  
db/db 2

Control 3  
db/db 3

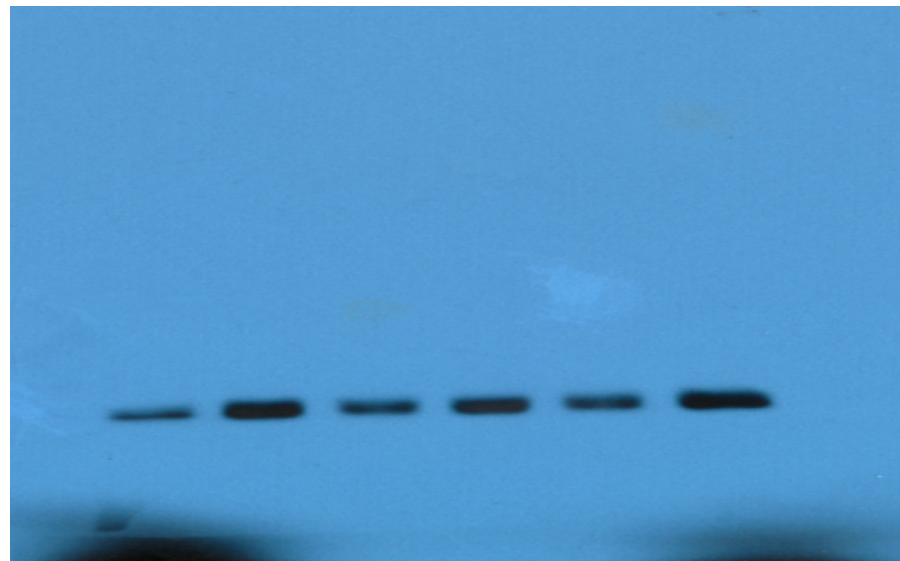

H-Ferritin

Control 1  
db/db 1

Control 2  
db/db 2

Control 3  
db/db 3

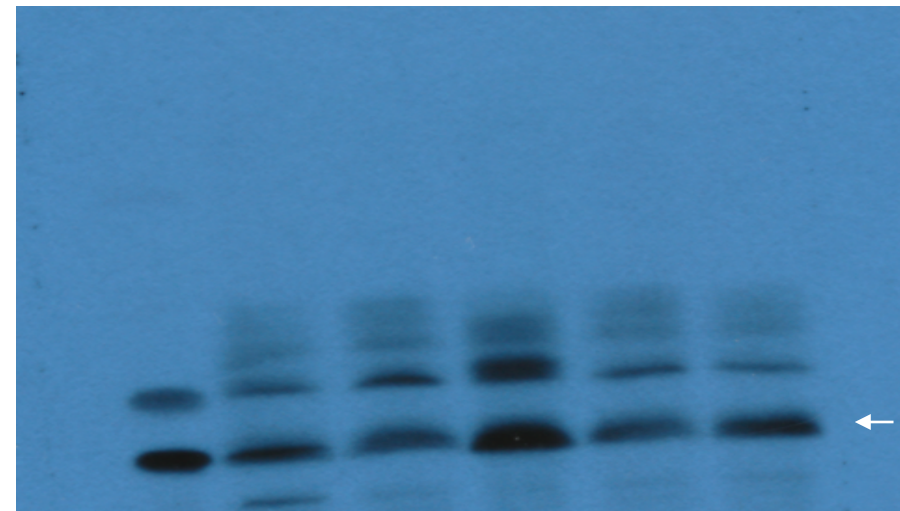

L-Ferritin

Control 1  
db/db 1

Control 2  
db/db 2

Control 3  
db/db 3

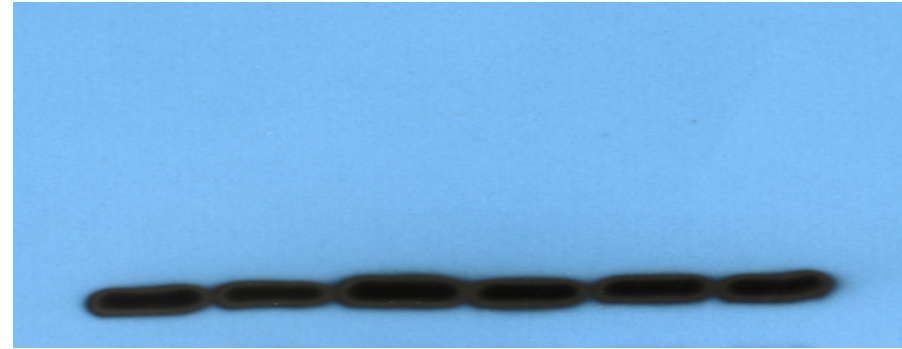

$\beta$ -actin

Control 1  
STZ 1    Control 2  
          STZ 2

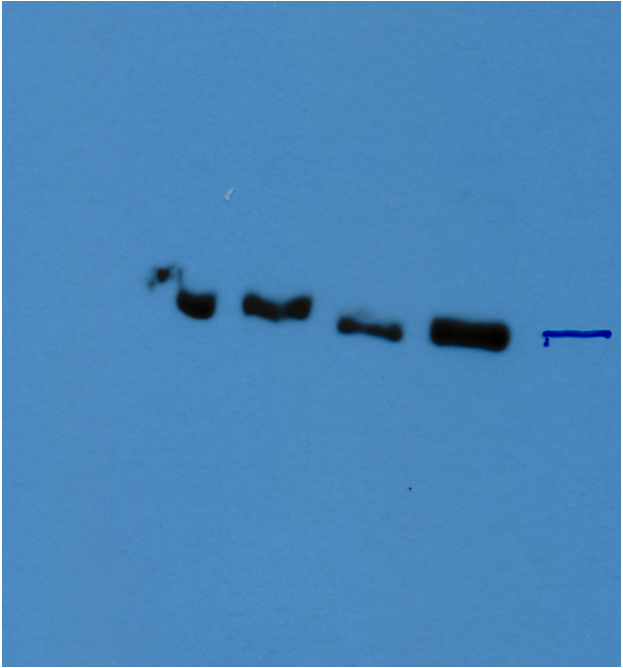

H-Ferritin

Control 1  
STZ 1    Control 2  
          STZ 2

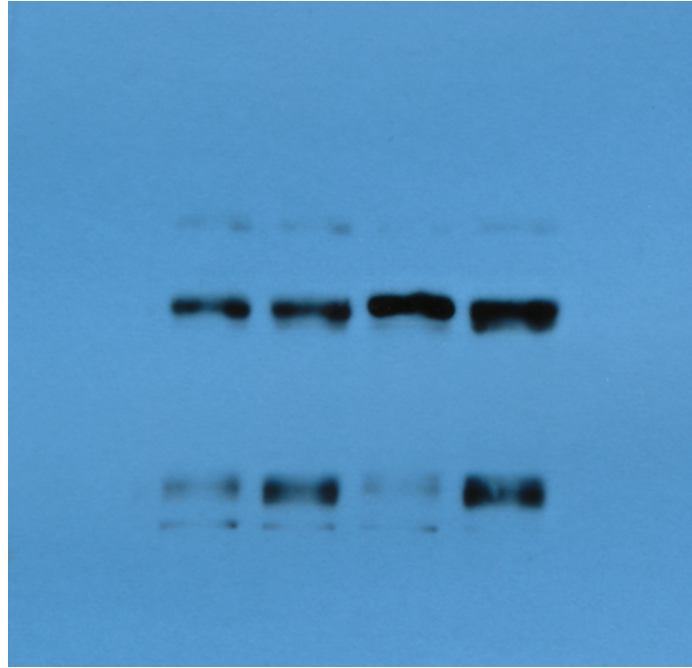

$\beta$ -actin

L-Ferritin

# HFE WT EYE

Diabetic 1   Diabetic 2   Diabetic 3   Diabetic 4   Control 1   Control 2   Control 3   Control 4

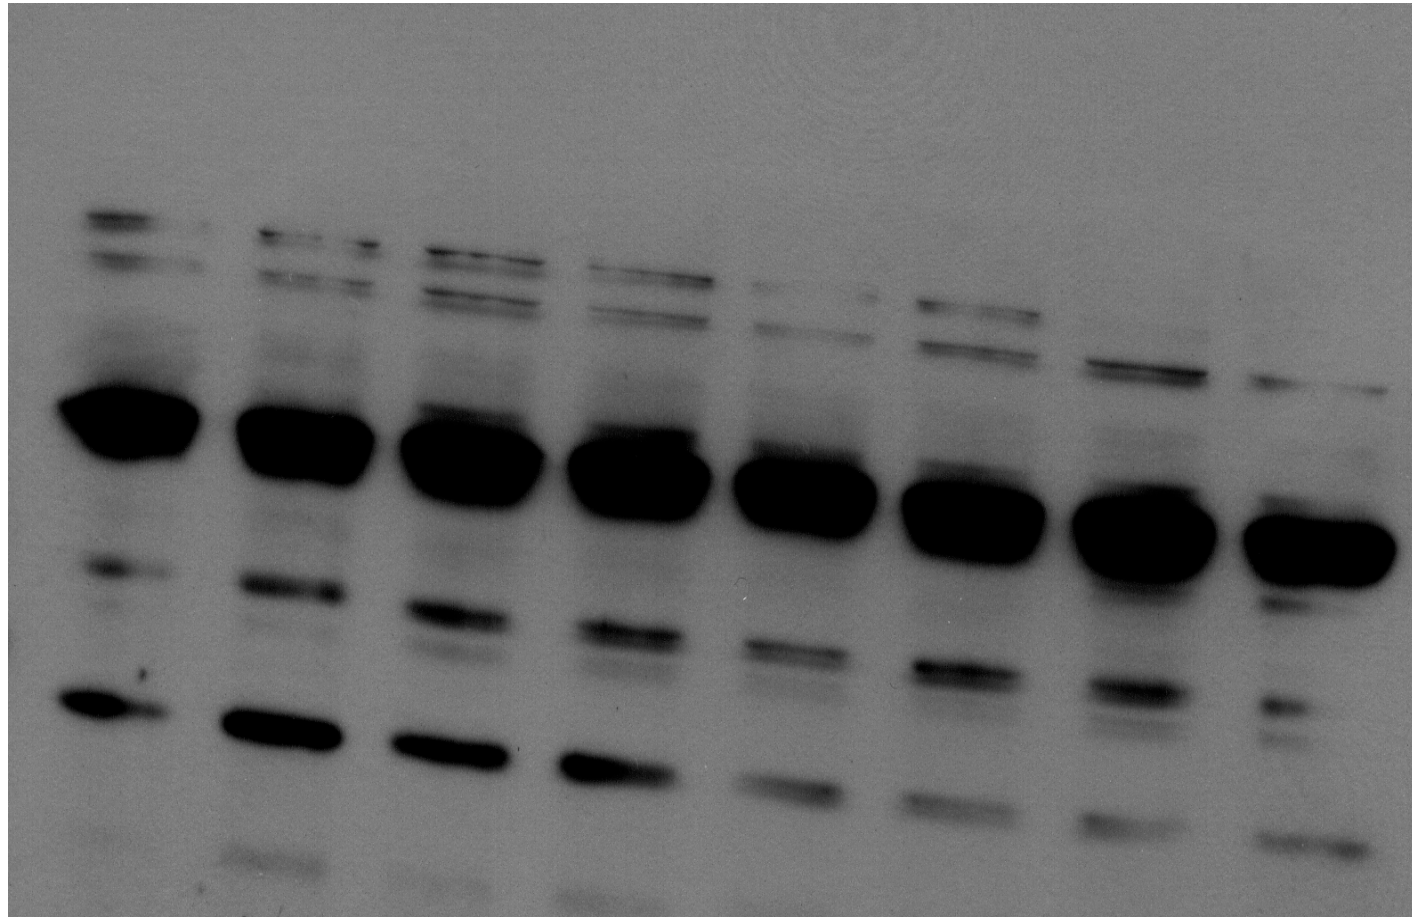

L-Ferritin

# HFE KO EYE

Diabetic 1 Diabetic 2 Diabetic 3 Control 1 Control 2 Control 3 Control 4

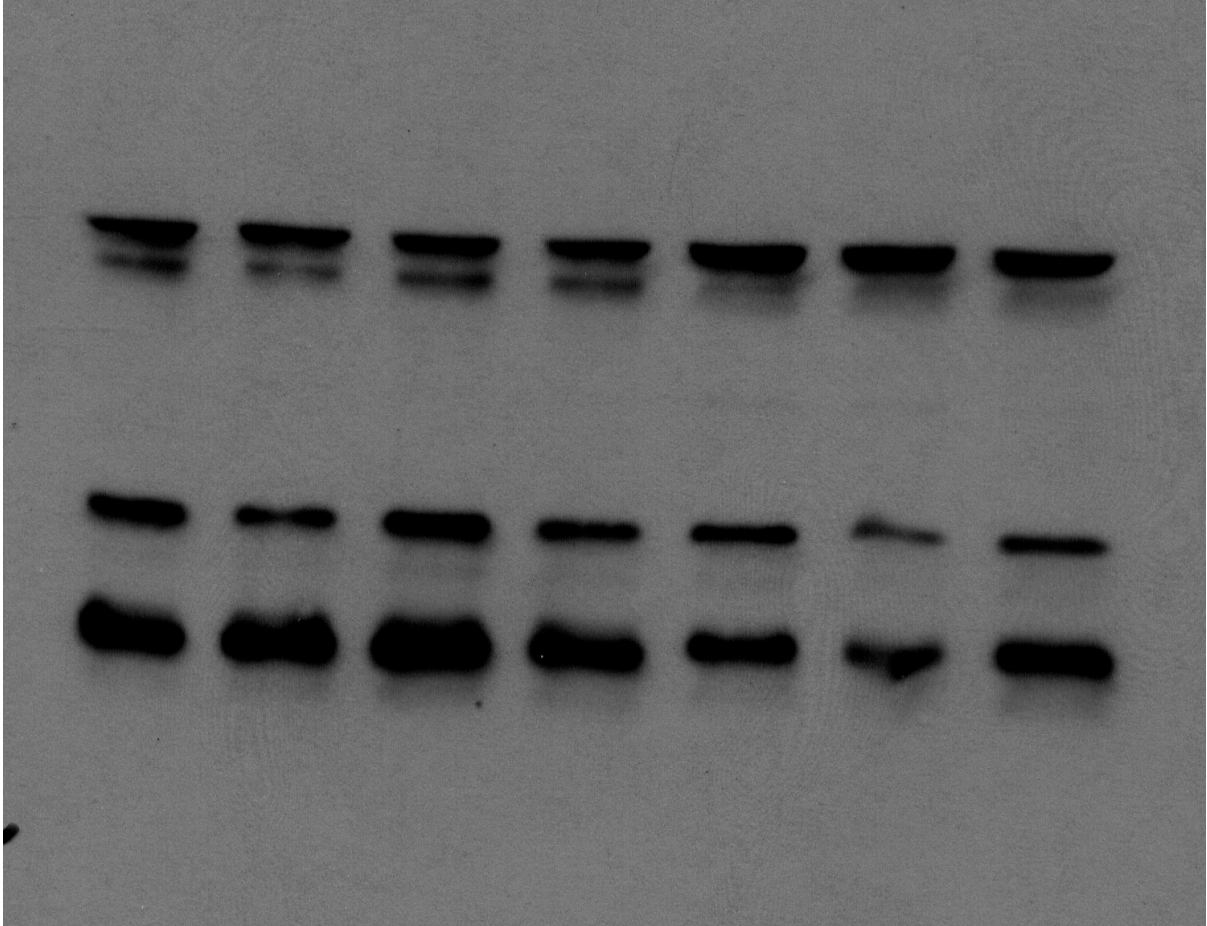

L-Ferritin

Pos Con 1 Pos Con 2 WT Con KO Con WT Db KO Db

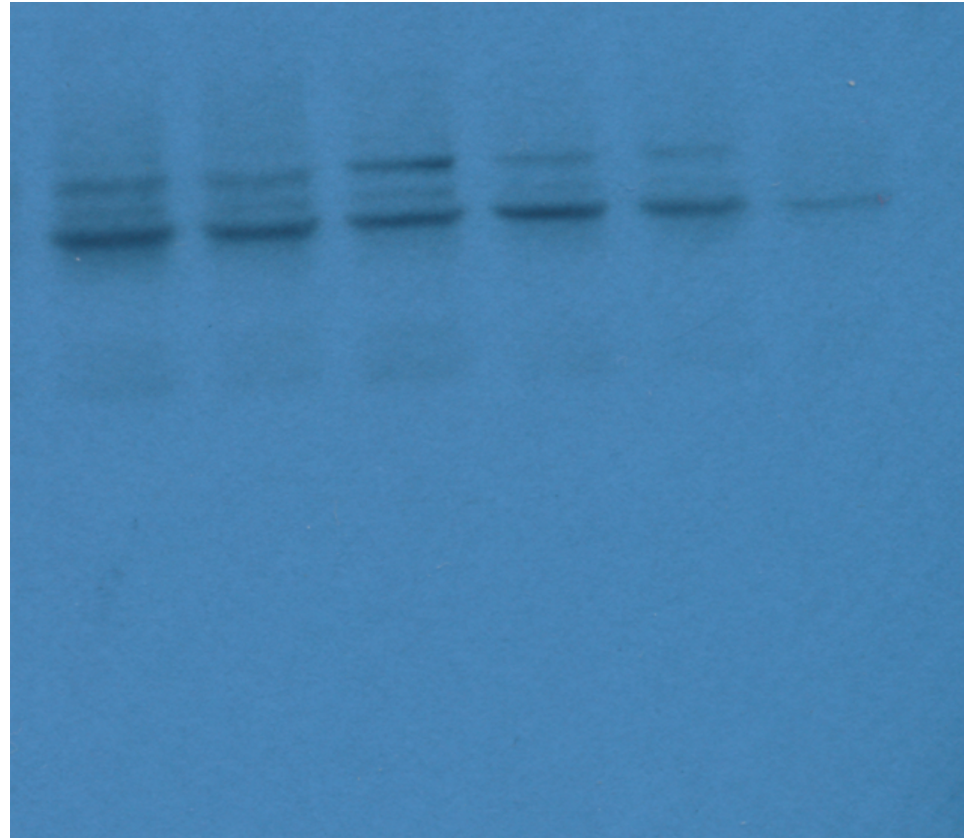

ZO-1

WT Con  
KO Con  
WT Db  
KO Db

WT Con  
KO Con  
WT Db  
KO Db

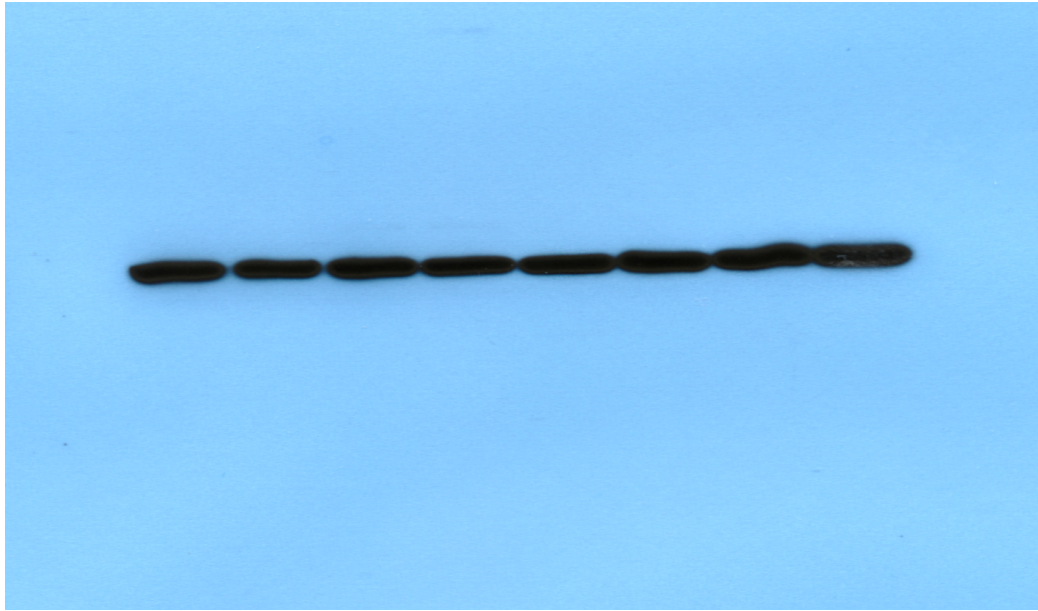

$\beta$ -actin



Pos Con 1 Pos Con 2 WT Con KO Con WT Db KO Db

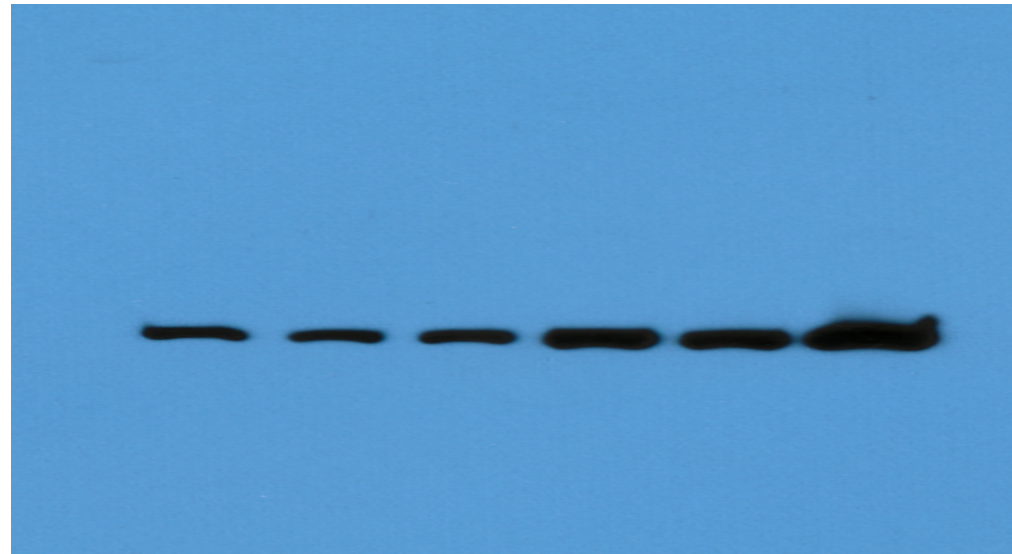

Renin
